# Supplementary material
Source: HighWire-hosted journal article supplement (https://erj.ersjournals.com/content/59/3/2100935)
Supplement: inline-supplementary-material-3 [file inline-supplementary-material-3.pdf]

**Supplementary Table S1.** Response to biological treatment of patients in Table 1

|                                                    | <b>Mepolizumab</b>                               | <b>Omalizumab</b>                  |
|----------------------------------------------------|--------------------------------------------------|------------------------------------|
| <b>Blood eosinophils (cells/<math>\mu</math>l)</b> |                                                  |                                    |
| Pre-treatment                                      | 598.6 $\pm$ 694.6                                | 278.0 $\pm$ 188.6                  |
| On treatment                                       | 65.7 $\pm$ 31.0 ( <b>p=0.02</b> )                | 200.0 $\pm$ 185.1 (p=0.43)         |
| <b>FeNO (ppb)</b>                                  |                                                  |                                    |
| Pre-treatment                                      | 52.8 $\pm$ 28.8                                  | 35.6 $\pm$ 36.6                    |
| On treatment                                       | 49.1 $\pm$ 35.0 (p=0.60)                         | 22.9 $\pm$ 12.1 (p=0.47)           |
| <b>FEV1 (% predicted)</b>                          |                                                  |                                    |
| Pre-treatment                                      | 77.8 $\pm$ 17.8                                  | 69.0 $\pm$ 23.2                    |
| On treatment                                       | 71.3 $\pm$ 13.3 (p=0.087)                        | 69.0 $\pm$ 22.2 (p=1)              |
| <b>FEV1 postBD (% predicted)</b>                   |                                                  |                                    |
| Pre-treatment                                      | 81.9 $\pm$ 19.2)                                 | 74.4 $\pm$ 22.7                    |
| On treatment                                       | 80.8 $\pm$ 13.5 (p=0.78)                         | 79.5 $\pm$ 20.2 (p=0.45)           |
| <b>Exacerbations/year</b>                          |                                                  |                                    |
| Pre-treatment                                      | 2.60 $\pm$ 1.51                                  | 2.22 $\pm$ 1.79                    |
| On treatment                                       | 0.13 $\pm$ 0.28 ( <b>p=7.1x10<sup>-4</sup></b> ) | 0.38 $\pm$ 0.55 ( <b>p=0.015</b> ) |
| <b>ACQ</b>                                         |                                                  |                                    |
| Pre-treatment                                      | 2.50 $\pm$ 1.76                                  | 3.41 $\pm$ 0.89                    |
| On treatment                                       | 1.57 $\pm$ 0.68 (p=0.21)                         | 2.91 $\pm$ 1.22 (p=0.24)           |

Results are expressed as mean  $\pm$  SD and p-values are given for comparisons of variables pre- and post-establishment of the treatment in each patients group (paired t-tests). ACQ: asthma control questionnaire; FeNO: exhaled nitric oxide; FEV1: forced expiratory volume in 1 s; postBD: post-bronchodilator treatment.
